# Supplementary material
Source: PubMed Central journal article supplement (PMC10922883)

Supplemental Figure- full length western blots (From Figure 6)

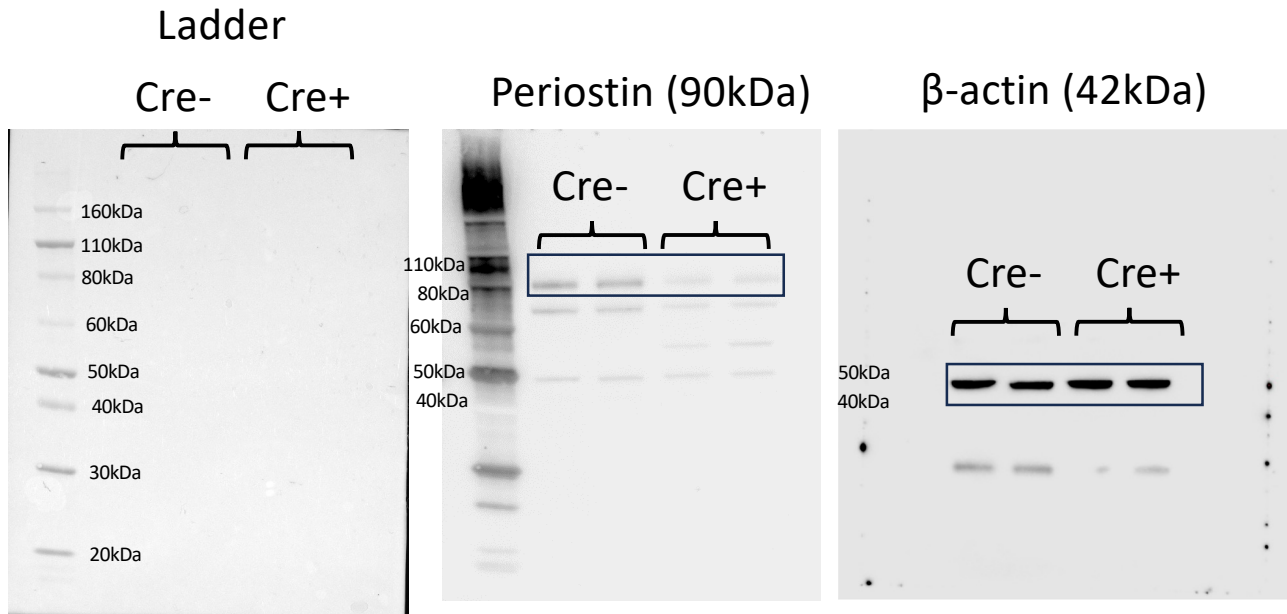

Supplement: NIHMS1952983-supplement-1.pdf [file NIHMS1952983-supplement-1.pdf]
